# Supplementary material for: Selenium Concentration Levels in Two Polluted Lagoons, Eastern Red Sea Coastal Waters
Source: MDPI journal article supplement (doi:10.3390/w15040687), 2023-02-09
Supplement: s1 [file s1]

Archive with 1 entries (1 files):
- water-2196388-supplementary.pdf
